# Supplementary material for: A UHPLC-MS/SRM method for analysis of phenolics from Camellia sinensis leaves from Nilgiri hills
Source: Royal Society of Chemistry journal article supplement (doi:10.1039/c6ay02329k), 2016-01-01
Supplement: c6ay02329k1.pdf [file c6ay02329k1.pdf]

**UHPLC-MS/SRM Method for Analysis of Phenolics from *Camellia sinensis*  
Leaves from Nilgiri Hills**

**Supplementary Data**

**Padma Ramakrishnan and Kannan Rangiah\***

*Metabolomics Facility, National Centre for Biological Sciences, GKVK,  
Bellary Road, Bangalore-560065, India.*

\* Corresponding author: Metabolomics Facility, National Centre for Biological Sciences,  
GKVK, Bellary Road, Bangalore-560065, India.

Fax: + 91-80-2363 6662, E-mail:kannanr@ncbs.res.in

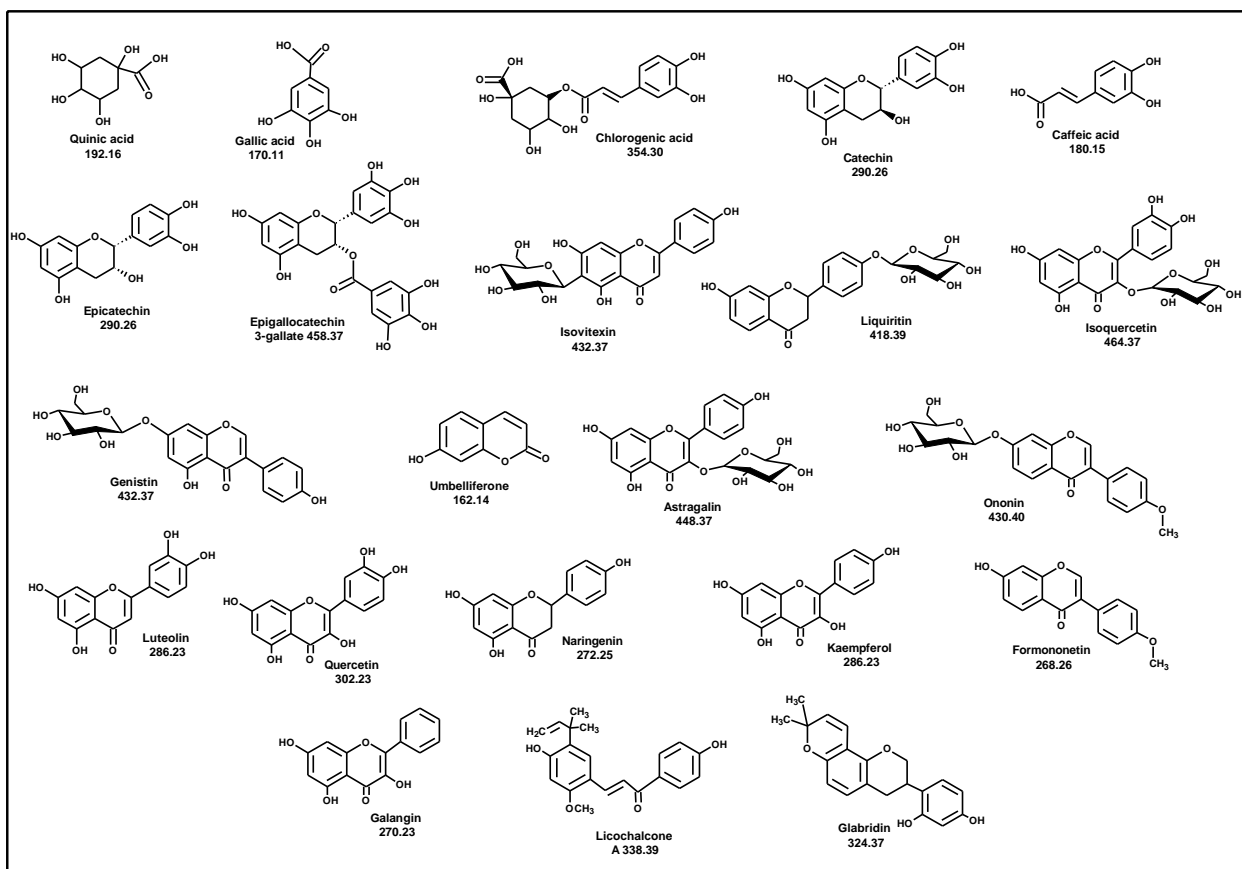

**Supplementary Figure 1:** Chemical structure for all twenty two phenolics analyzed in this study.

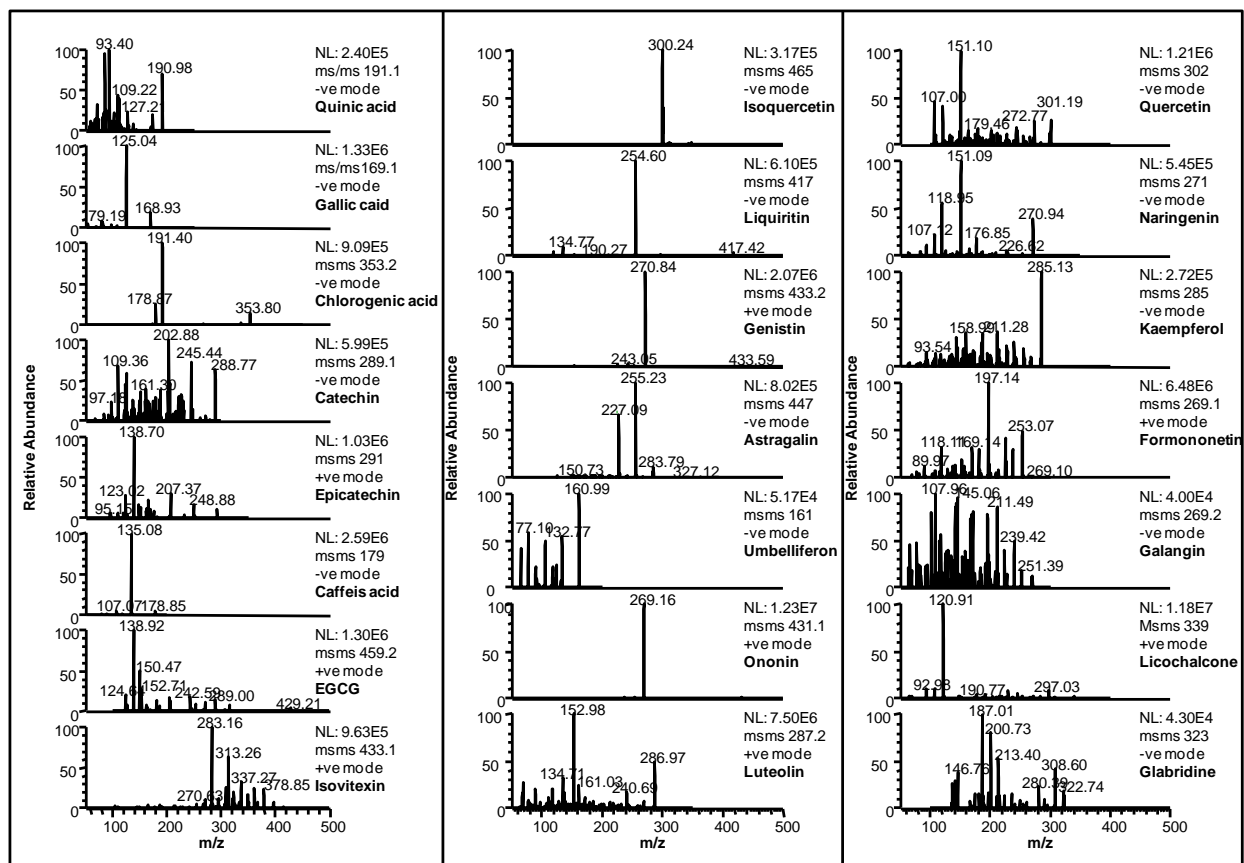

**Supplementary Figure 2:** MS/MS analysis of all twenty two phenolics analyzed in both positive and negative ion modes.

**Supplementary table 1:** Regression analysis of the standard curve.

| Phenolics                  | Slope  |       | Intercept |       | R <sup>2</sup> |       |
|----------------------------|--------|-------|-----------|-------|----------------|-------|
|                            | Mean   | SD    | Mean      | SD    | Mean           | SD    |
| Quinic acid                | 0.025  | 0.002 | 0.004     | 0.006 | 0.999          | 0.002 |
| Gallic acid                | 0.518  | 0.083 | 0.340     | 0.118 | 0.996          | 0.002 |
| Chlorogenic acid           | 0.771  | 0.064 | 0.012     | 0.006 | 0.999          | 0.001 |
| Catechin                   | 0.177  | 0.023 | 0.016     | 0.013 | 0.999          | 0.002 |
| Epicatechin                | 0.132  | 0.035 | 0.013     | 0.011 | 0.997          | 0.001 |
| Caffeic acid               | 2.099  | 0.300 | 0.047     | 0.026 | 0.998          | 0.001 |
| Epigallocatechin-3-gallate | 0.173  | 0.015 | 0.009     | 0.011 | 0.997          | 0.001 |
| Isovitexin                 | 1.801  | 0.277 | 0.010     | 0.009 | 0.997          | 0.004 |
| Isoquercetin               | 1.841  | 0.065 | 0.015     | 0.016 | 0.998          | 0.001 |
| Liquiritin                 | 2.364  | 0.202 | 0.010     | 0.010 | 0.999          | 0.001 |
| Genistin                   | 4.513  | 0.636 | 0.003     | 0.004 | 0.999          | 0.001 |
| Astragalin                 | 1.654  | 0.091 | 0.010     | 0.010 | 1.000          | 0.000 |
| Umbelliferone              | 1.186  | 0.112 | 0.020     | 0.017 | 0.998          | 0.002 |
| Ononin                     | 35.909 | 1.739 | 0.014     | 0.005 | 0.999          | 0.002 |
| Luteolin                   | 0.658  | 0.061 | 0.013     | 0.004 | 0.997          | 0.001 |
| Quercetin                  | 0.612  | 0.070 | 0.023     | 0.044 | 0.998          | 0.002 |
| Naringenin                 | 2.052  | 0.111 | 0.041     | 0.045 | 0.999          | 0.001 |
| Kaempferol                 | 0.117  | 0.008 | 0.017     | 0.012 | 0.997          | 0.003 |
| Formononetin               | 9.099  | 0.278 | 0.005     | 0.005 | 0.998          | 0.003 |
| Galangin                   | 0.354  | 0.061 | 0.008     | 0.003 | 0.998          | 0.001 |
| Licochalcone A             | 31.002 | 0.586 | 0.003     | 0.002 | 0.998          | 0.002 |
| Glabridin                  | 0.833  | 0.042 | 0.004     | 0.003 | 0.999          | 0.000 |

**Supplementary table 2: Validation table for twenty two phenolics.**

|                                   | LOQ     | LQC     | MQC     | HQC     |
|-----------------------------------|---------|---------|---------|---------|
| <b>Quinic acid</b>                |         |         |         |         |
| ng on column                      | 1.563   | 3.125   | 20.000  | 40.000  |
| interday mean                     | 1.537   | 3.093   | 20.115  | 41.820  |
| %CV (n=3)                         | 4.937   | 2.714   | 1.943   | 2.028   |
| accuracy                          | 98.374  | 98.989  | 100.574 | 104.550 |
| <b>Epicatechin</b>                |         |         |         |         |
| ng on column                      | 0.313   | 0.625   | 4.000   | 8.000   |
| interday mean                     | 0.323   | 0.668   | 3.913   | 8.220   |
| %CV (n=3)                         | 5.595   | 6.314   | 6.749   | 2.207   |
| accuracy                          | 103.295 | 106.807 | 97.831  | 102.755 |
| <b>Isoquercetin</b>               |         |         |         |         |
| ng on column                      | 0.063   | 0.125   | 0.800   | 1.600   |
| interday mean                     | 0.066   | 0.133   | 0.845   | 1.766   |
| %CV (n=3)                         | 3.637   | 5.592   | 1.986   | 2.008   |
| accuracy                          | 105.657 | 106.093 | 105.597 | 110.356 |
| <b>Umbelliferone</b>              |         |         |         |         |
| ng on column                      | 0.078   | 0.156   | 1.000   | 2.000   |
| interday mean                     | 0.077   | 0.159   | 1.038   | 2.083   |
| %CV (n=3)                         | 3.197   | 2.624   | 2.941   | 2.285   |
| accuracy                          | 98.715  | 101.660 | 103.756 | 104.153 |
| <b>Naringenin</b>                 |         |         |         |         |
| ng on column                      | 0.156   | 0.313   | 2.000   | 4.000   |
| interday mean                     | 0.149   | 0.318   | 2.009   | 4.078   |
| %CV (n=3)                         | 1.405   | 2.022   | 2.105   | 1.424   |
| accuracy                          | 95.337  | 101.765 | 100.469 | 101.951 |
| <b>Licochalcone A</b>             |         |         |         |         |
| ng on column                      | 0.002   | 0.003   | 0.020   | 0.040   |
| interday mean                     | 0.002   | 0.003   | 0.020   | 0.040   |
| %CV (n=3)                         | 6.561   | 4.350   | 1.674   | 1.613   |
| accuracy                          | 102.231 | 105.875 | 101.847 | 99.860  |
| <b>Gallic acid</b>                |         |         |         |         |
| ng on column                      | 0.781   | 1.563   | 10.000  | 20.000  |
| interday mean                     | 0.709   | 1.602   | 10.516  | 21.079  |
| %CV (n=3)                         | 4.960   | 7.320   | 2.794   | 1.916   |
| accuracy                          | 90.759  | 102.517 | 105.162 | 105.393 |
| <b>Caffeic acid</b>               |         |         |         |         |
| ng on column                      | 0.078   | 0.156   | 1.000   | 2.000   |
| interday mean                     | 0.071   | 0.163   | 1.039   | 2.077   |
| %CV (n=3)                         | 3.740   | 2.265   | 2.186   | 1.933   |
| accuracy                          | 91.249  | 104.125 | 103.949 | 103.846 |
| <b>Liquiritin</b>                 |         |         |         |         |
| ng on column                      | 0.031   | 0.063   | 0.400   | 0.800   |
| interday mean                     | 0.032   | 0.067   | 0.416   | 0.853   |
| %CV (n=3)                         | 2.555   | 2.744   | 1.628   | 1.614   |
| accuracy                          | 101.218 | 106.468 | 104.091 | 106.594 |
| <b>Ononin</b>                     |         |         |         |         |
| ng on column                      | 0.002   | 0.003   | 0.020   | 0.040   |
| interday mean                     | 0.001   | 0.003   | 0.020   | 0.040   |
| %CV (n=3)                         | 5.352   | 2.867   | 1.216   | 2.243   |
| accuracy                          | 95.044  | 99.889  | 100.513 | 99.683  |
| <b>Kaempferol</b>                 |         |         |         |         |
| ng on column                      | 0.781   | 1.563   | 10.000  | 20.000  |
| interday mean                     | 0.689   | 1.582   | 10.222  | 20.526  |
| %CV (n=3)                         | 3.192   | 2.269   | 3.011   | 2.245   |
| accuracy                          | 88.247  | 101.220 | 102.220 | 102.631 |
| <b>Glabridin</b>                  |         |         |         |         |
| ng on column                      | 0.063   | 0.125   | 0.800   | 1.600   |
| interday mean                     | 0.063   | 0.130   | 0.792   | 1.620   |
| %CV (n=3)                         | 4.459   | 1.834   | 3.792   | 2.077   |
| accuracy                          | 100.108 | 104.071 | 99.034  | 101.237 |
| <b>Chlorogenic acid</b>           |         |         |         |         |
| ng on column                      | 0.156   | 0.313   | 2.000   | 4.000   |
| interday mean                     | 0.147   | 0.307   | 1.974   | 4.001   |
| %CV (n=3)                         | 2.583   | 2.926   | 1.986   | 1.514   |
| accuracy                          | 94.090  | 98.380  | 98.720  | 100.024 |
| <b>Epigallocatechin 3-gallate</b> |         |         |         |         |
| ng on column                      | 0.313   | 0.625   | 4.000   | 8.000   |
| interday mean                     | 0.309   | 0.598   | 3.936   | 8.104   |
| %CV (n=3)                         | 6.802   | 9.777   | 5.135   | 2.595   |
| accuracy                          | 98.735  | 95.671  | 98.404  | 101.294 |
| <b>Genistin</b>                   |         |         |         |         |
| ng on column                      | 0.016   | 0.031   | 0.200   | 0.400   |
| interday mean                     | 0.016   | 0.033   | 0.205   | 0.420   |
| %CV (n=3)                         | 5.021   | 3.402   | 2.678   | 2.369   |
| accuracy                          | 104.402 | 106.063 | 102.291 | 104.945 |
| <b>Luteolin</b>                   |         |         |         |         |
| ng on column                      | 0.078   | 0.156   | 1.000   | 2.000   |
| interday mean                     | 0.078   | 0.153   | 1.010   | 2.105   |
| %CV (n=3)                         | 6.108   | 5.629   | 2.338   | 2.656   |
| accuracy                          | 100.242 | 97.665  | 100.982 | 105.244 |
| <b>Formononetin</b>               |         |         |         |         |
| ng on column                      | 0.003   | 0.006   | 0.040   | 0.080   |
| interday mean                     | 0.003   | 0.006   | 0.040   | 0.080   |
| %CV (n=3)                         | 7.515   | 3.584   | 1.408   | 1.747   |
| accuracy                          | 99.058  | 102.298 | 100.658 | 100.088 |
| <b>Catechin</b>                   |         |         |         |         |
| ng on column                      | 0.313   | 0.625   | 4.000   | 8.000   |
| interday mean                     | 0.316   | 0.637   | 4.001   | 8.165   |
| %CV (n=3)                         | 5.386   | 2.210   | 3.619   | 2.185   |
| accuracy                          | 101.042 | 101.922 | 100.020 | 102.063 |
| <b>Isovitexin</b>                 |         |         |         |         |
| ng on column                      | 0.031   | 0.063   | 0.400   | 0.800   |
| interday mean                     | 0.031   | 0.065   | 0.388   | 0.783   |
| %CV (n=3)                         | 6.935   | 7.107   | 3.563   | 3.040   |
| accuracy                          | 100.505 | 103.670 | 96.933  | 97.818  |
| <b>Astragalin</b>                 |         |         |         |         |
| ng on column                      | 0.063   | 0.125   | 0.800   | 1.600   |
| interday mean                     | 0.064   | 0.133   | 0.845   | 1.697   |
| %CV (n=3)                         | 1.638   | 2.527   | 1.870   | 3.148   |
| accuracy                          | 102.750 | 106.118 | 105.632 | 106.048 |
| <b>Quercetin</b>                  |         |         |         |         |
| ng on column                      | 0.156   | 0.313   | 2.000   | 4.000   |
| interday mean                     | 0.169   | 0.292   | 1.949   | 4.052   |
| %CV (n=3)                         | 2.884   | 1.613   | 1.775   | 3.204   |
| accuracy                          | 108.379 | 93.521  | 97.440  | 101.293 |
| <b>Galangin</b>                   |         |         |         |         |
| ng on column                      | 0.078   | 0.156   | 1.000   | 2.000   |
| interday mean                     | 0.083   | 0.156   | 1.019   | 2.096   |
| %CV (n=3)                         | 3.725   | 1.582   | 3.660   | 3.389   |
| accuracy                          | 106.382 | 99.850  | 101.923 | 104.790 |
